# Supplementary material for: Synthesis of β-Cyclodextrin-Decorated Dendritic Compounds Based on EDTA Core: A New Class of PAMAM Dendrimer Analogs
Source: MDPI journal article supplement (doi:10.3390/pharmaceutics14112363), 2022-11-02
Supplement: s1 [file s1]

# Synthesis of $\beta$ -cyclodextrin-decorated dendritic compounds based on EDTA core: a new class of PAMAM dendrimer analogs

Israel González-Méndez <sup>1</sup>, Esteban Loera-Loera <sup>1,2</sup>, Kendra Sorroza-Martínez <sup>3</sup>, Mireille Vonlanthen <sup>3</sup>, Fabián Cuétara-Guadarrama <sup>3</sup>, María Josefa Bernad-Bernad <sup>4</sup>, Ernesto Rivera <sup>3,\*</sup> and Jesús Gracia-Mora <sup>1,\*\*</sup>.

## *Supplementary Information*

### Analysis data of

|                                                                                                              |     |
|--------------------------------------------------------------------------------------------------------------|-----|
| <b>Figure S1.</b> <sup>1</sup> H-NMR spectrum of <i>tert</i> -butyl (4-hydroxyphenethyl)carbamate.           | p3  |
| <b>Figure S2.</b> <sup>13</sup> C-NMR spectrum of <i>tert</i> -butyl (4-hydroxyphenethyl)carbamate.          | p3  |
| <b>Figure S3.</b> IR spectrum of <i>tert</i> -butyl (4-hydroxyphenethyl)carbamate.                           | p4  |
| <b>Figure S4.</b> DART spectrum of <i>tert</i> -butyl (4-hydroxyphenethyl)carbamate.                         | p4  |
| <b>Figure S5.</b> <sup>1</sup> H-NMR spectrum of <i>tert</i> -butyl (4-(prop-2-yn-1-yloxy)phenyl)carbamate.  | p5  |
| <b>Figure S6.</b> <sup>13</sup> C-NMR spectrum of <i>tert</i> -butyl (4-(prop-2-yn-1-yloxy)phenyl)carbamate. | p5  |
| <b>Figure S7.</b> IR spectrum of <i>tert</i> -butyl (4-(prop-2-yn-1-yloxy)phenyl)carbamate.                  | p6  |
| <b>Figure S8.</b> DART spectrum of <i>tert</i> -butyl (4-(prop-2-yn-1-yloxy)phenyl)carbamate.                | p6  |
| <b>Figure S9.</b> <sup>1</sup> H-NMR spectrum of 2-(4-(prop-2-yn-1-yloxy)phenyl)ethan-1-amine.               | p7  |
| <b>Figure S10.</b> <sup>13</sup> C-NMR spectrum of 2-(4-(prop-2-yn-1-yloxy)phenyl)ethan-1-amine.             | p7  |
| <b>Figure S11.</b> IR spectrum of 2-(4-(prop-2-yn-1-yloxy)phenyl)ethan-1-amine.                              | p8  |
| <b>Figure S12.</b> DART spectrum of 2-(4-(prop-2-yn-1-yloxy)phenyl)ethan-1-amine.                            | p8  |
| <b>Figure S13.</b> <sup>1</sup> H-NMR spectrum of disubstituted EDTA alkyne.                                 | p9  |
| <b>Figure S14.</b> <sup>13</sup> C-NMR spectrum of disubstituted EDTA alkyne.                                | p9  |
| <b>Figure S15.</b> IR spectrum of disubstituted EDTA alkyne.                                                 | p10 |
| <b>Figure S16.</b> ESI spectrum of disubstituted EDTA alkyne.                                                | p10 |

|                                                                                      |     |
|--------------------------------------------------------------------------------------|-----|
| <b>Figure S17.</b> $^1\text{H}$ -NMR spectrum of tetrasubstituted EDTA G0-alkyne.    | p11 |
| <b>Figure S18.</b> $^{13}\text{C}$ -NMR spectrum of tetrasubstituted EDTA G0-alkyne. | p11 |
| <b>Figure S19.</b> IR spectrum of tetrasubstituted EDTA G0-alkyne.                   | p12 |
| <b>Figure S20.</b> ESI spectrum of tetrasubstituted EDTA G0-alkyne.                  | p12 |
| <b>Figure S21.</b> $^1\text{H}$ -NMR spectrum of dendritic EDTA di- $\beta$ CD.      | p13 |
| <b>Figure S22.</b> $^{13}\text{C}$ -NMR spectrum of dendritic EDTA di- $\beta$ CD.   | p13 |
| <b>Figure S23.</b> 2D NMR HMQC spectrum of dendritic EDTA di- $\beta$ CD.            | p14 |
| <b>Figure S24.</b> 2D NMR COSY spectrum of dendritic EDTA di- $\beta$ CD.            | p14 |
| <b>Figure S25.</b> IR spectrum of dendritic EDTA di- $\beta$ CD.                     | p15 |
| <b>Figure S26.</b> ESI-TOF spectrum of dendritic EDTA di- $\beta$ CD.                | p15 |
| <b>Figure S27.</b> $^1\text{H}$ -NMR spectrum of EDTA G0- $\beta$ CD dendrimer.      | p16 |
| <b>Figure S28.</b> $^{13}\text{C}$ -NMR spectrum of EDTA G0- $\beta$ CD dendrimer.   | p16 |
| <b>Figure S29.</b> 2D NMR COSY spectrum of EDTA G0- $\beta$ CD dendrimer.            | p17 |
| <b>Figure S30.</b> IR spectrum of EDTA G0- $\beta$ CD dendrimer.                     | p17 |
| <b>Figure S31.</b> MALDI spectrum of EDTA G0- $\beta$ CD dendrimer.                  | p18 |

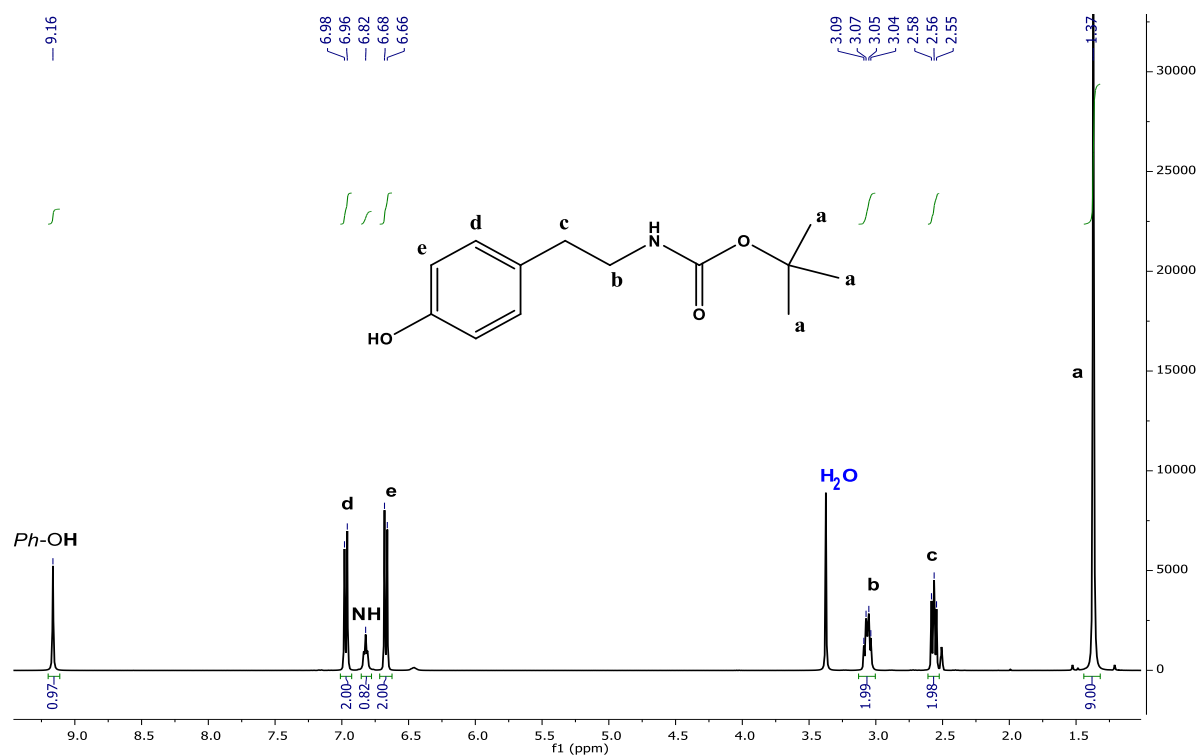

**Figure S1.** <sup>1</sup>H-NMR spectrum of *tert*-butyl (4-hydroxyphenethyl)carbamate.

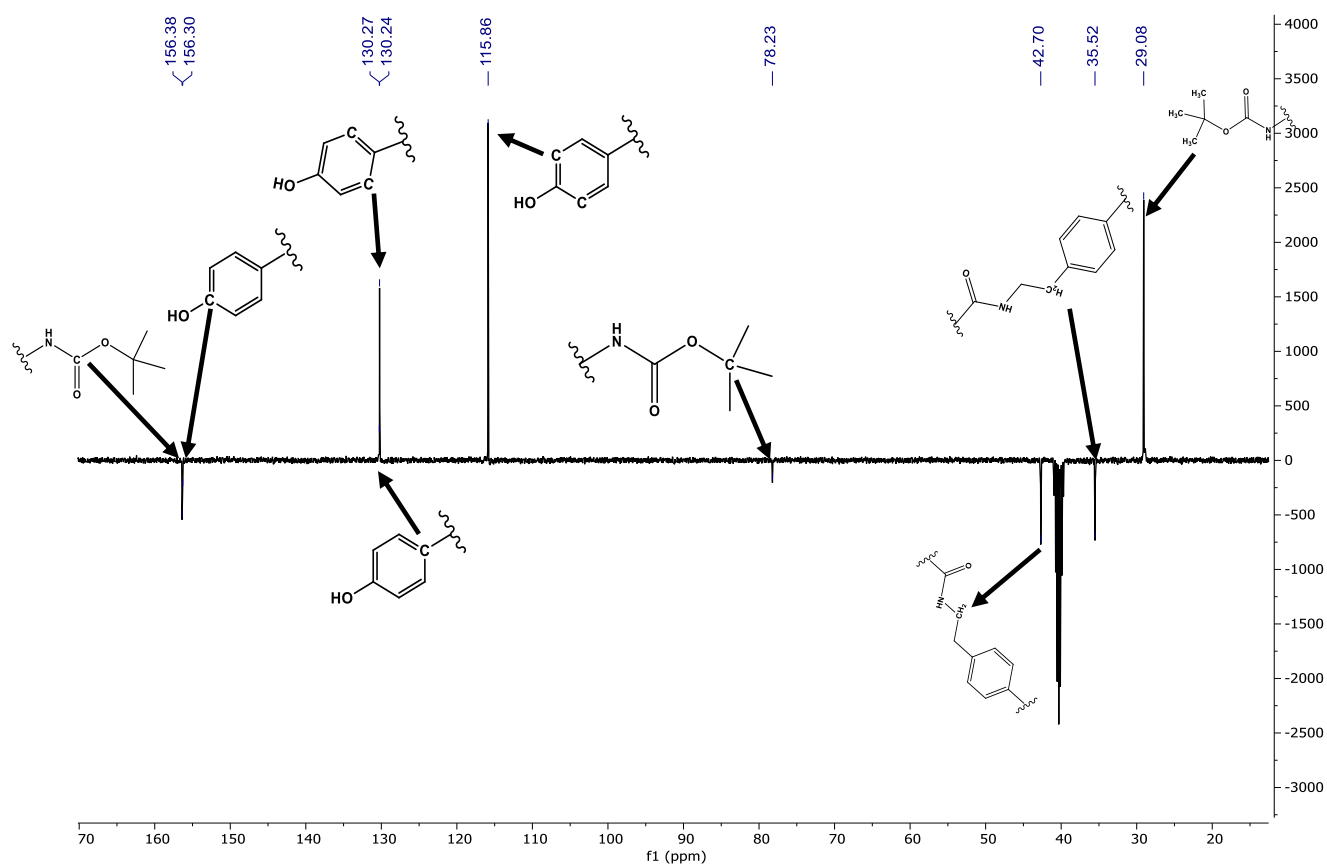

**Figure S2.** <sup>13</sup>C-NMR spectrum of *tert*-butyl (4-hydroxyphenethyl)carbamate.

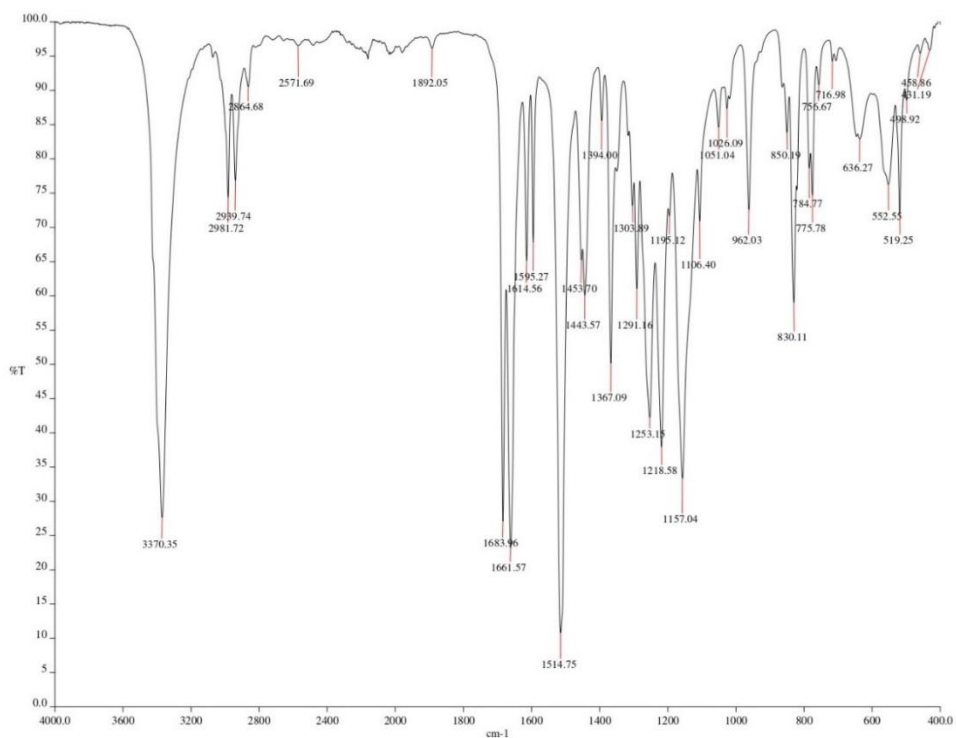

**Figure S3.** IR spectrum of *tert*-butyl (4-hydroxyphenethyl)carbamate.

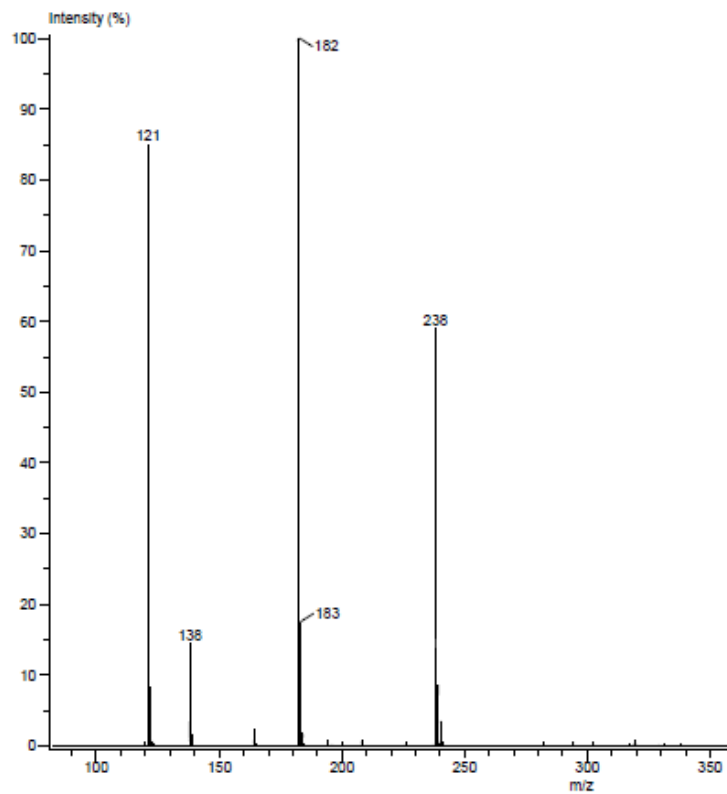

**Figure S4.** DART *tert*-butyl (4-hydroxyphenethyl)carbamate.

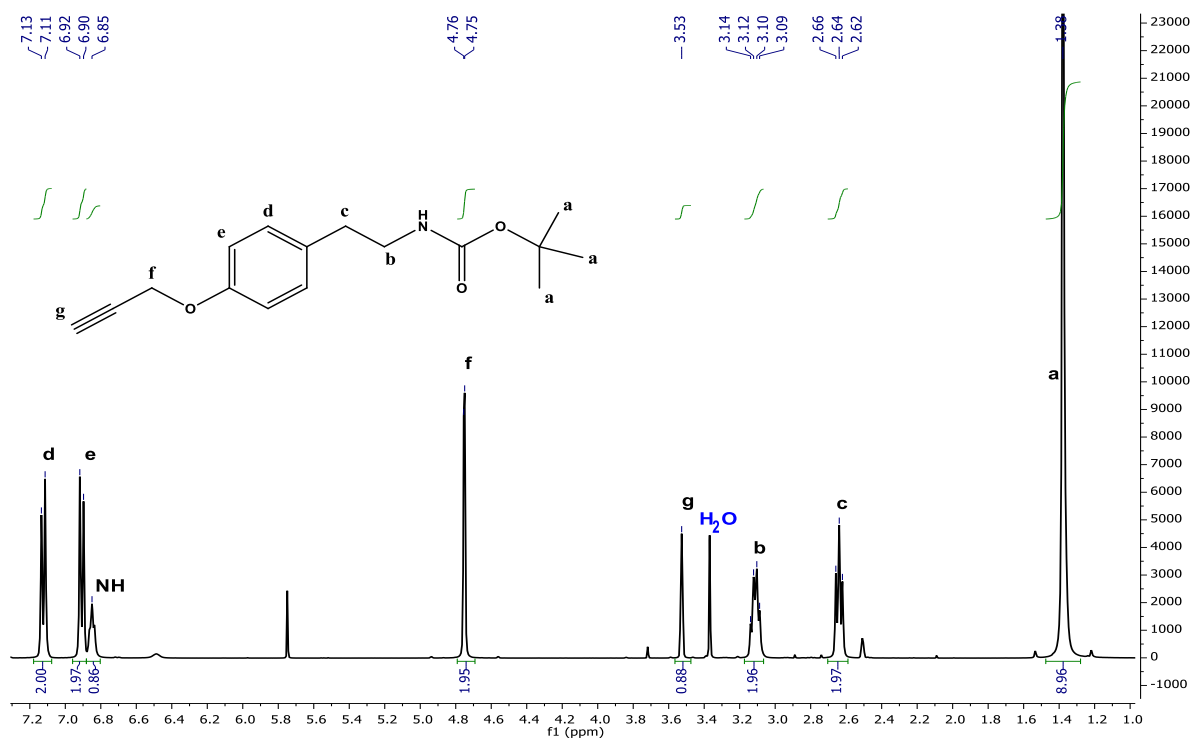

**Figure S5.** <sup>1</sup>H-NMR spectrum of *tert*-butyl (4-(prop-2-yn-1-yloxy)phenyl)carbamate.

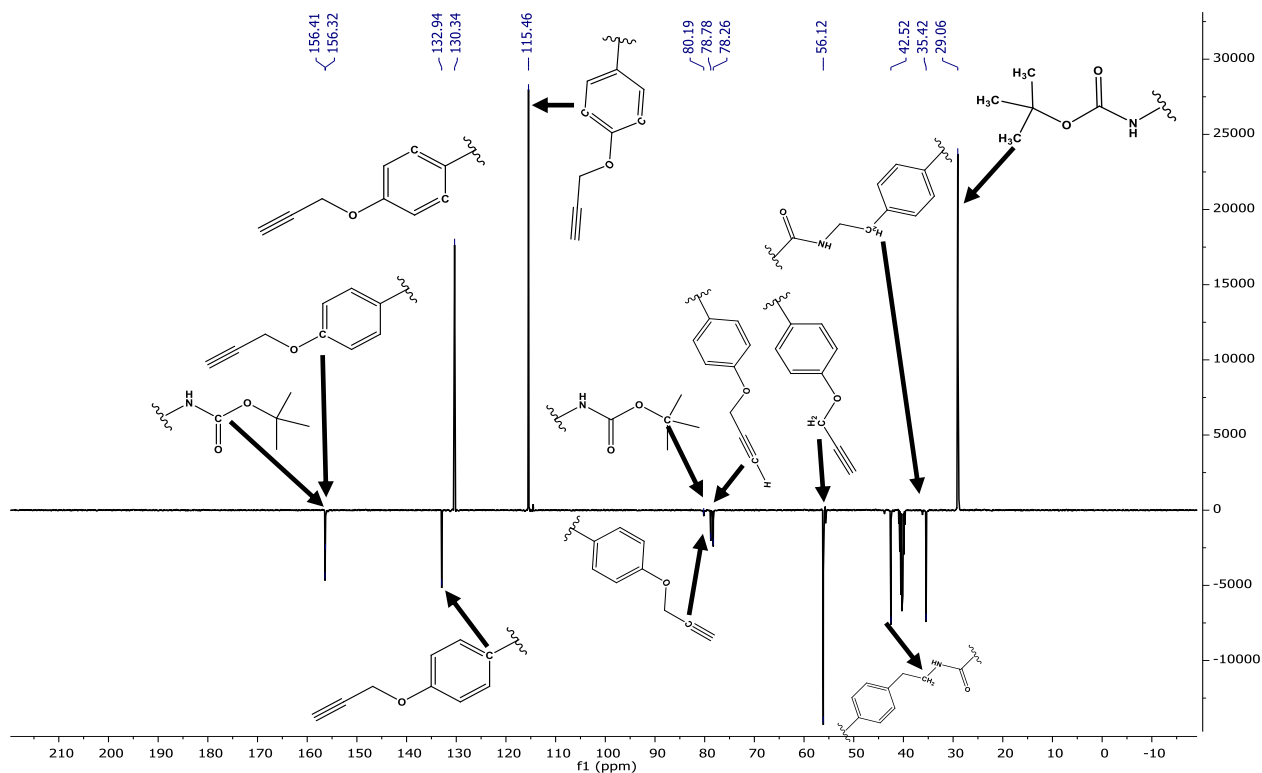

**Figure S6.** <sup>13</sup>C-NMR spectrum of *tert*-butyl (4-(prop-2-yn-1-yloxy)phenyl)carbamate.

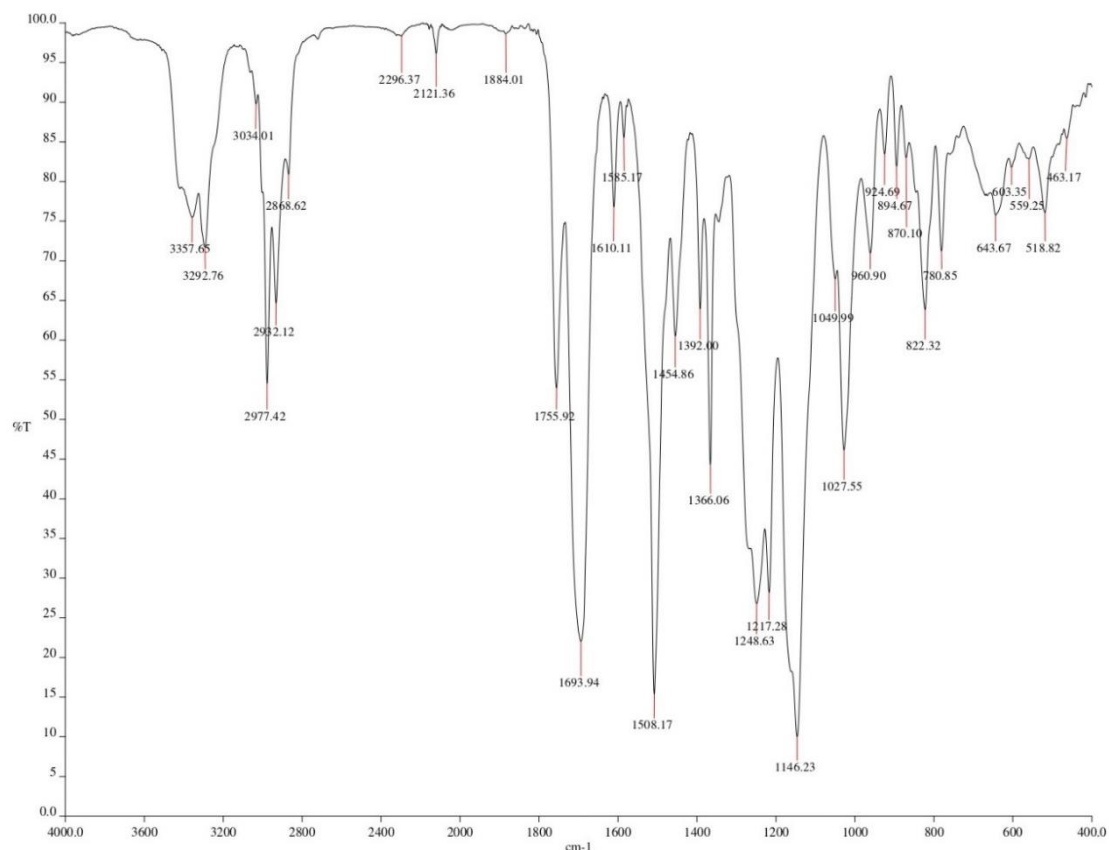

**Figure S7.** IR spectrum of *tert*-butyl (4-(prop-2-yn-1-yloxy)phenyl)carbamate.

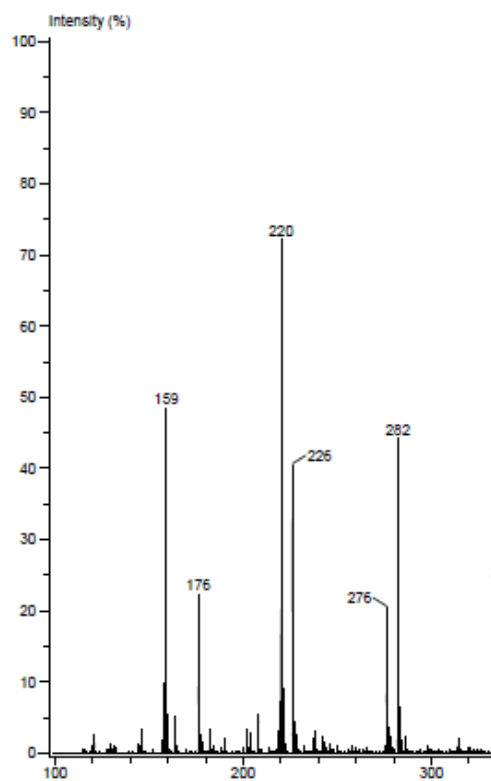

**Figure S8.** DART spectrum of *tert*-butyl (4-(prop-2-yn-1-yloxy)phenyl)carbamate.

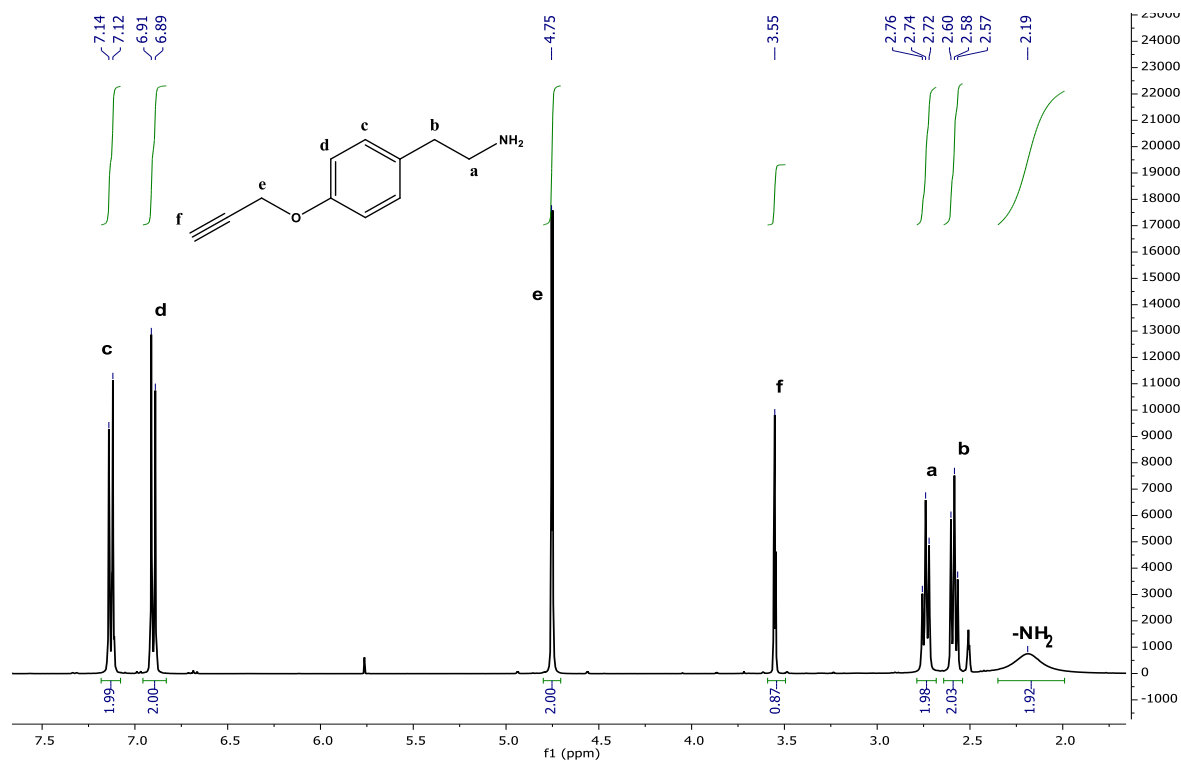

**Figure S9.** <sup>1</sup>H-NMR spectrum of 2-(4-(prop-2-yn-1-yloxy)phenyl)ethan-1-amine.

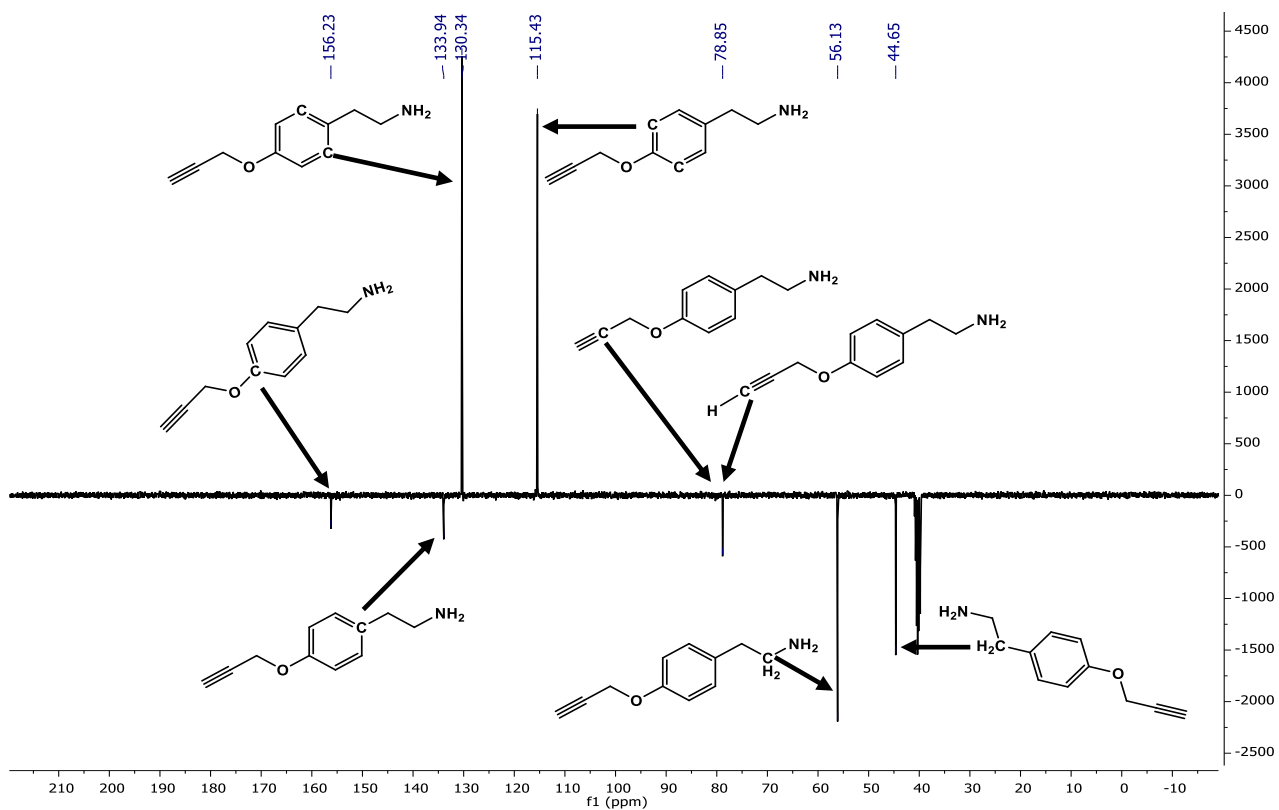

**Figure S10.** <sup>13</sup>C-NMR spectrum of 2-(4-(prop-2-yn-1-yloxy)phenyl)ethan-1-amine.

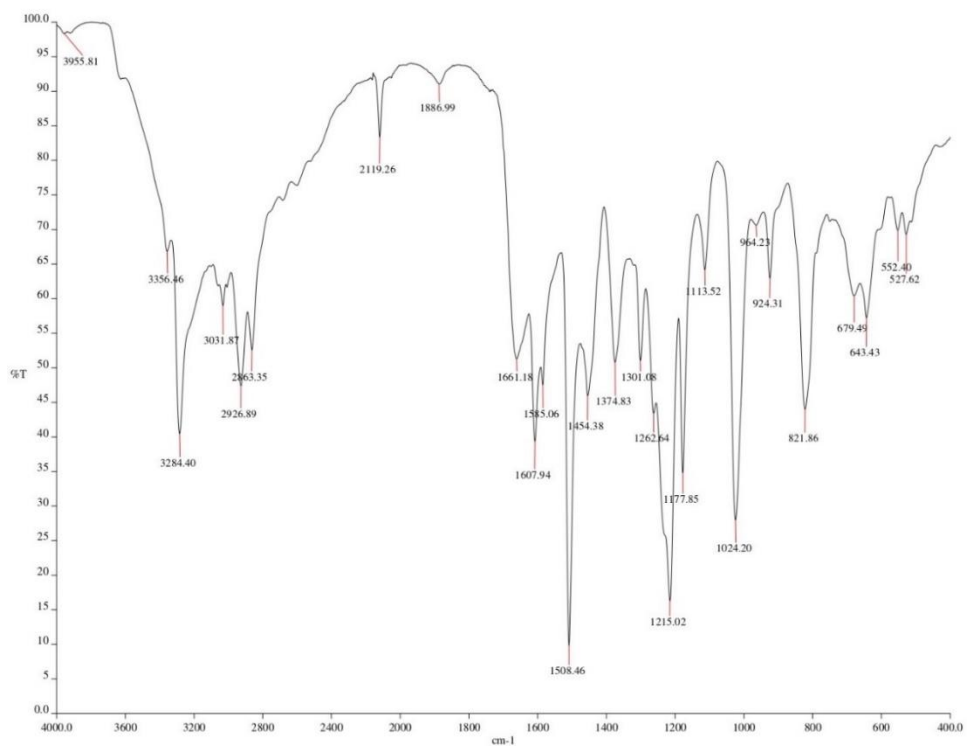

**Figure S11.** IR spectrum of 2-(4-(prop-2-yn-1-yloxy)phenyl)ethan-1-amine.

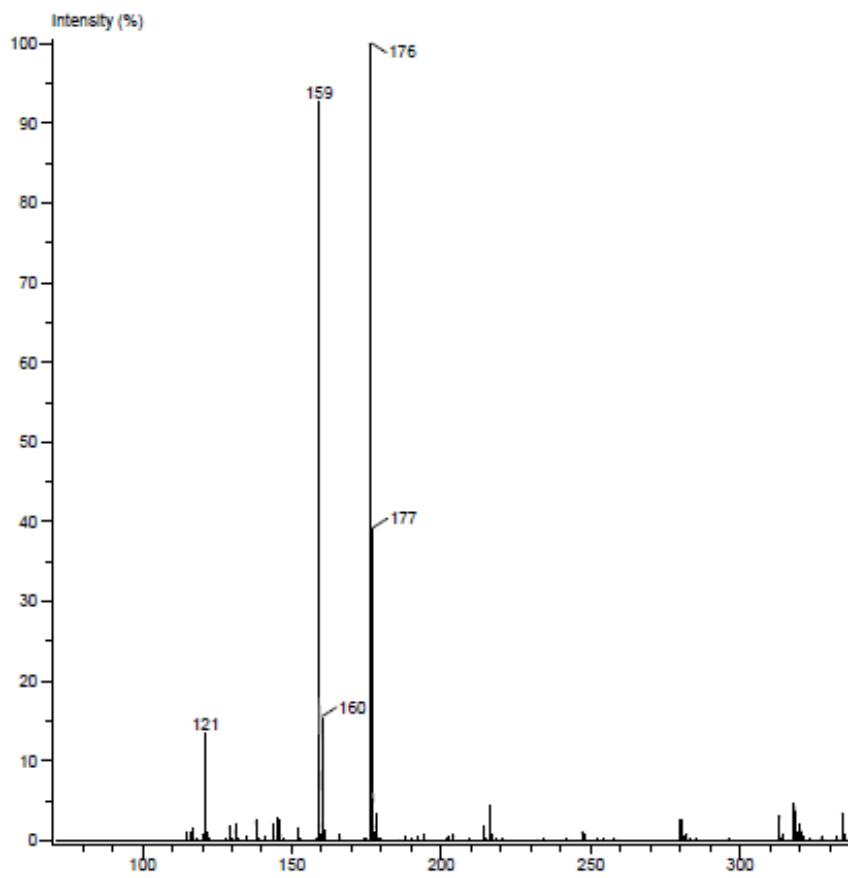

**Figure S12.** DART spectrum of 2-(4-(prop-2-yn-1-yloxy)phenyl)ethan-1-amine.

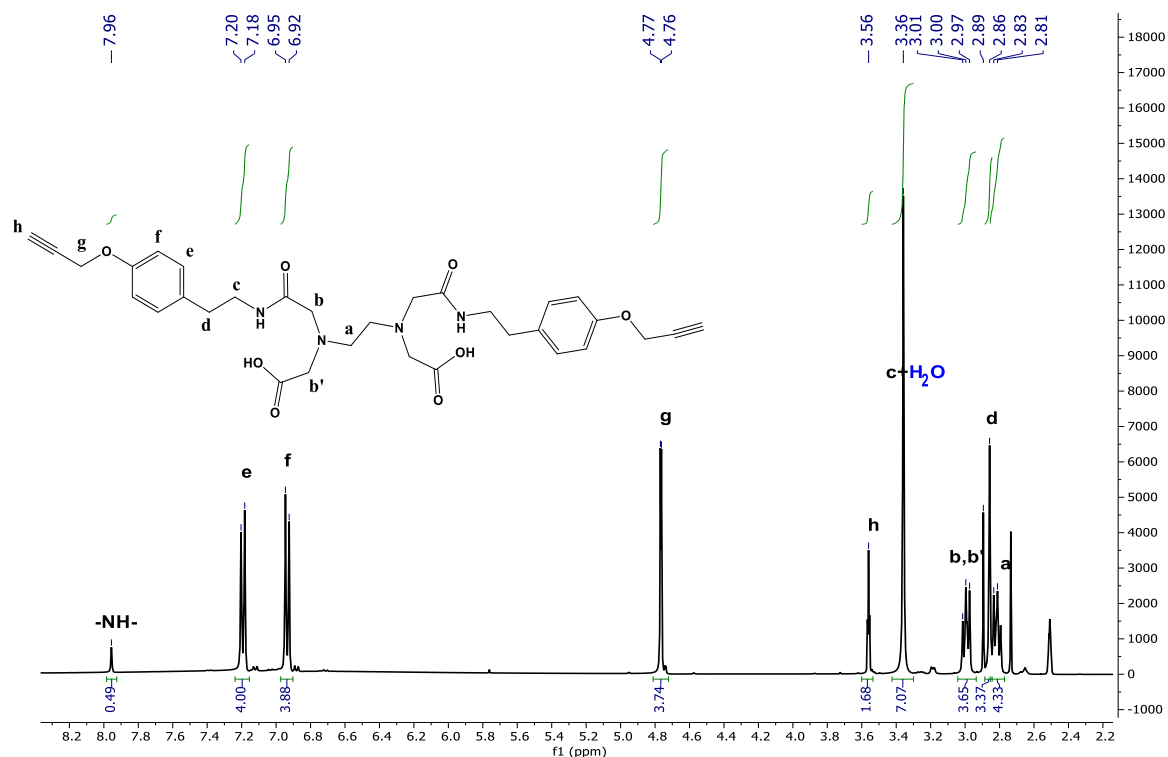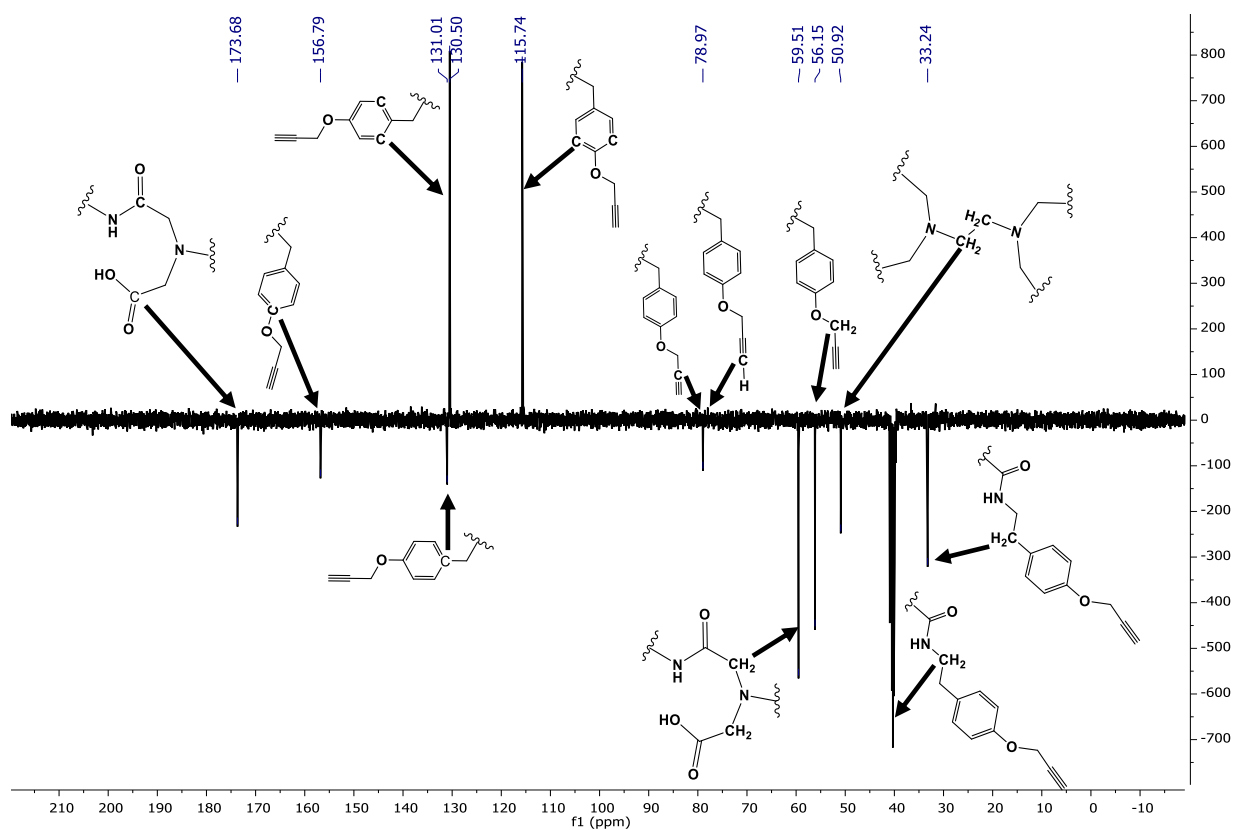

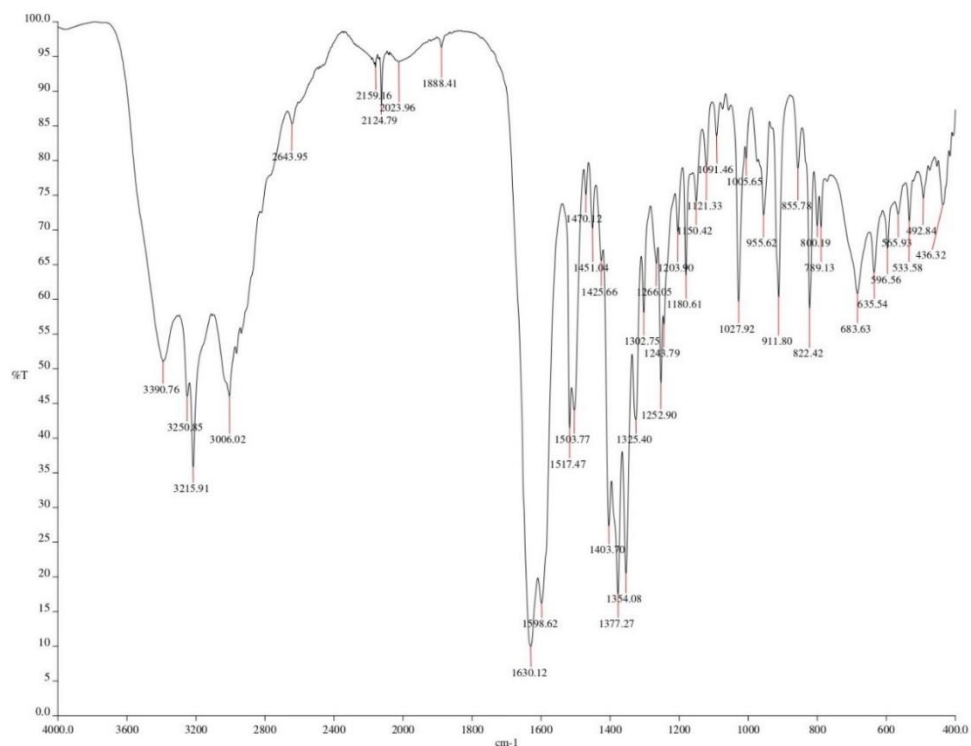

**Figure S15.** IR spectrum of disubstituted EDTA alkyne.

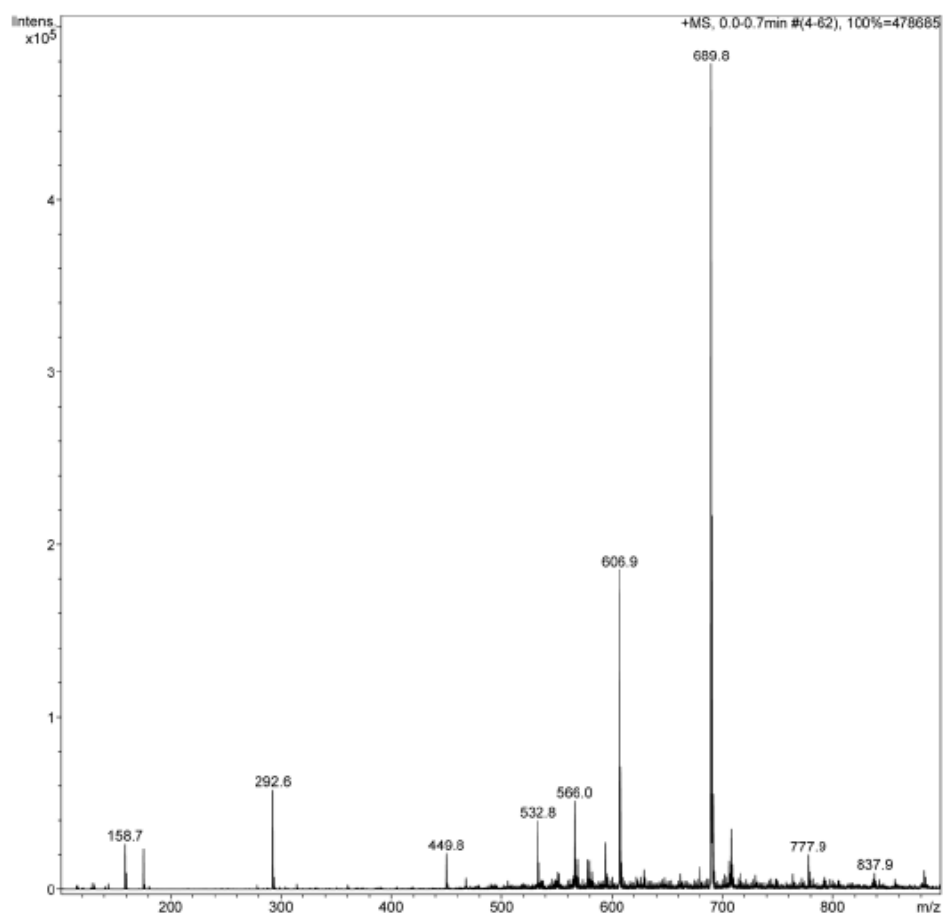

**Figure S16.** ESI spectrum of disubstituted EDTA alkyne.

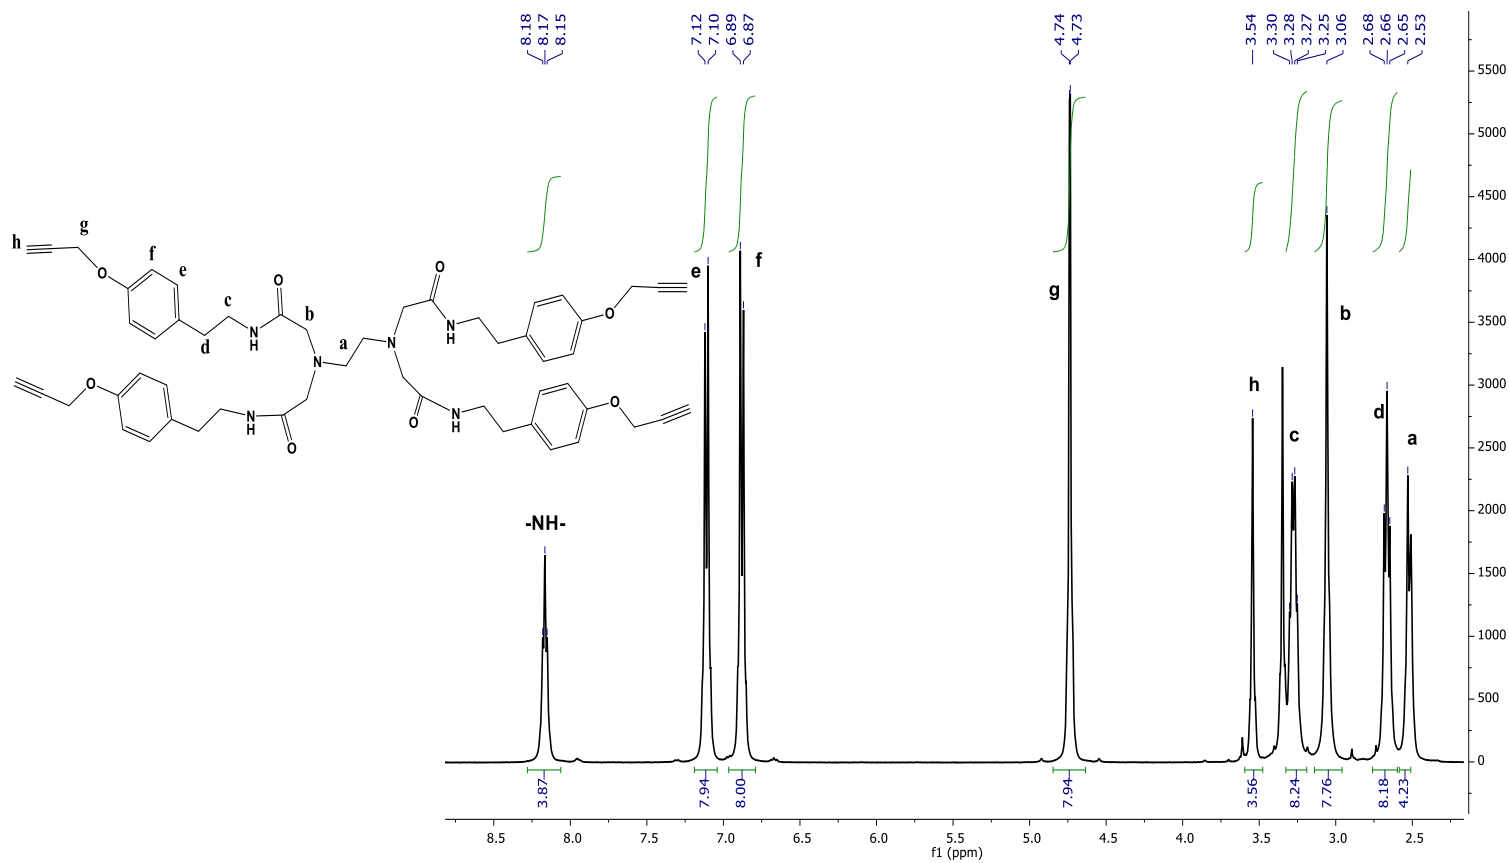

**Figure S17.** <sup>1</sup>H-NMR spectrum of tetrasubstituted EDTA G0-alkyne.

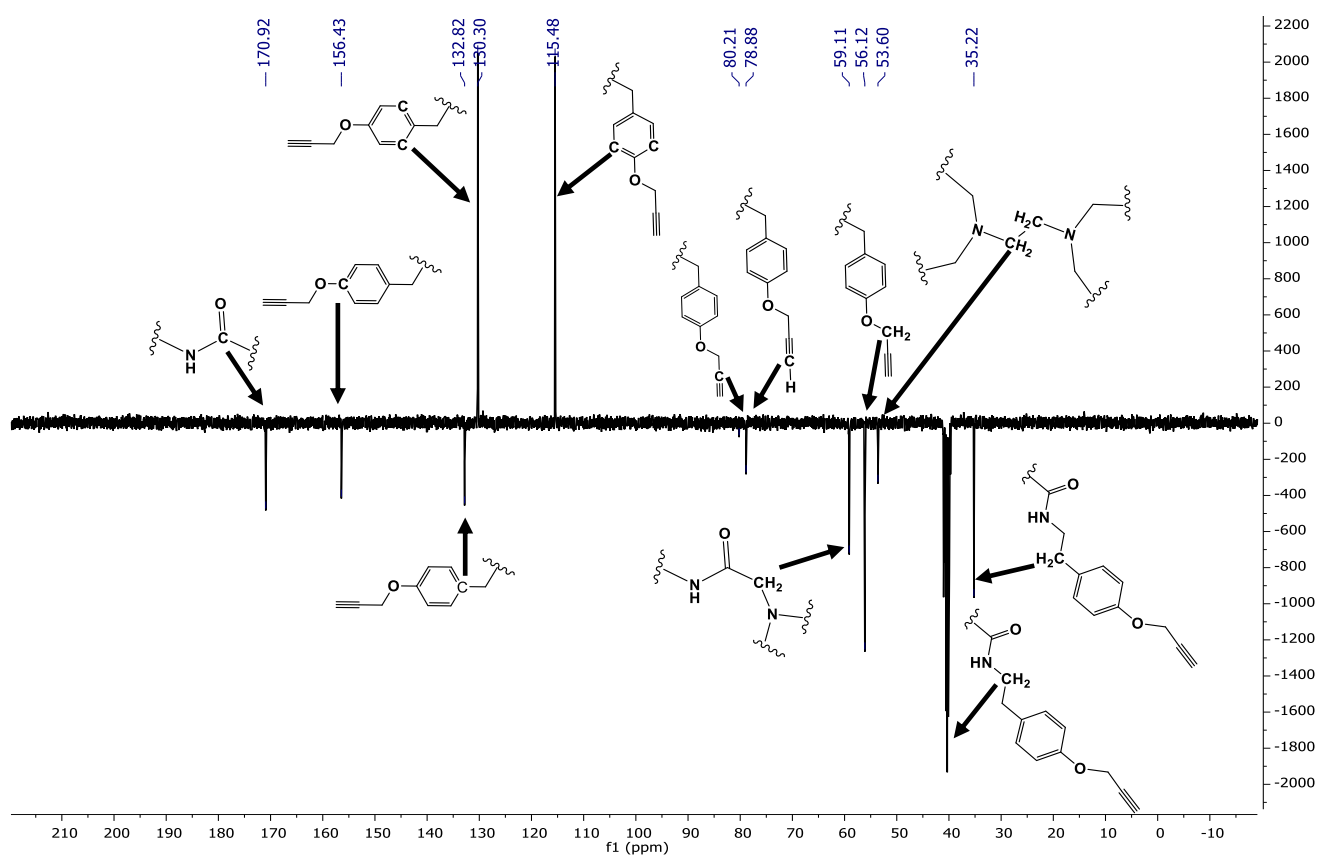

**Figure S18.** <sup>13</sup>C-NMR spectrum of tetrasubstituted EDTA G0-alkyne.

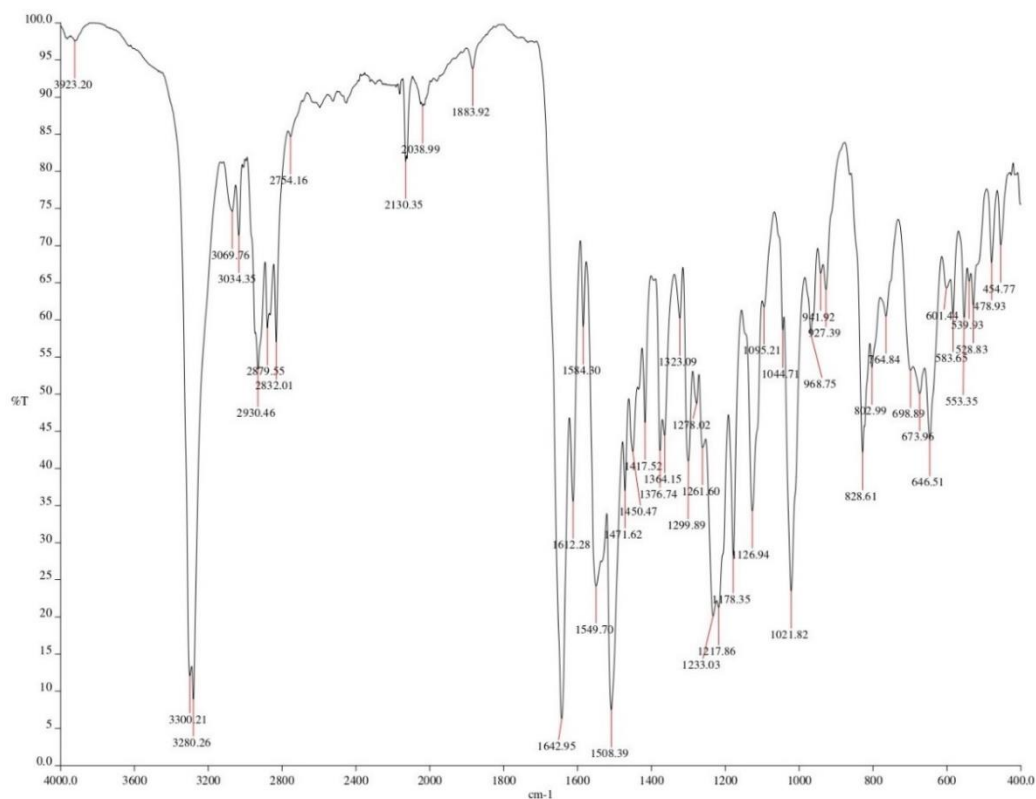

**Figure S19.** IR spectrum of tetrasubstituted EDTA G0-alkyne.

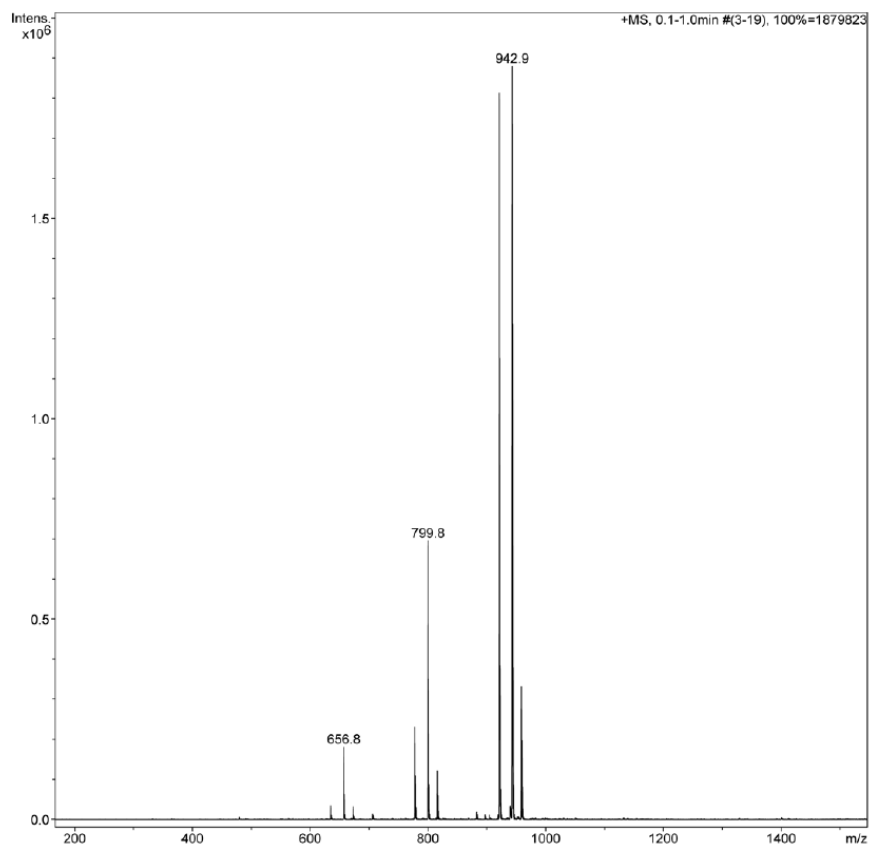

**Figure S20.** ESI spectrum of tetrasubstituted EDTA G0-alkyne.

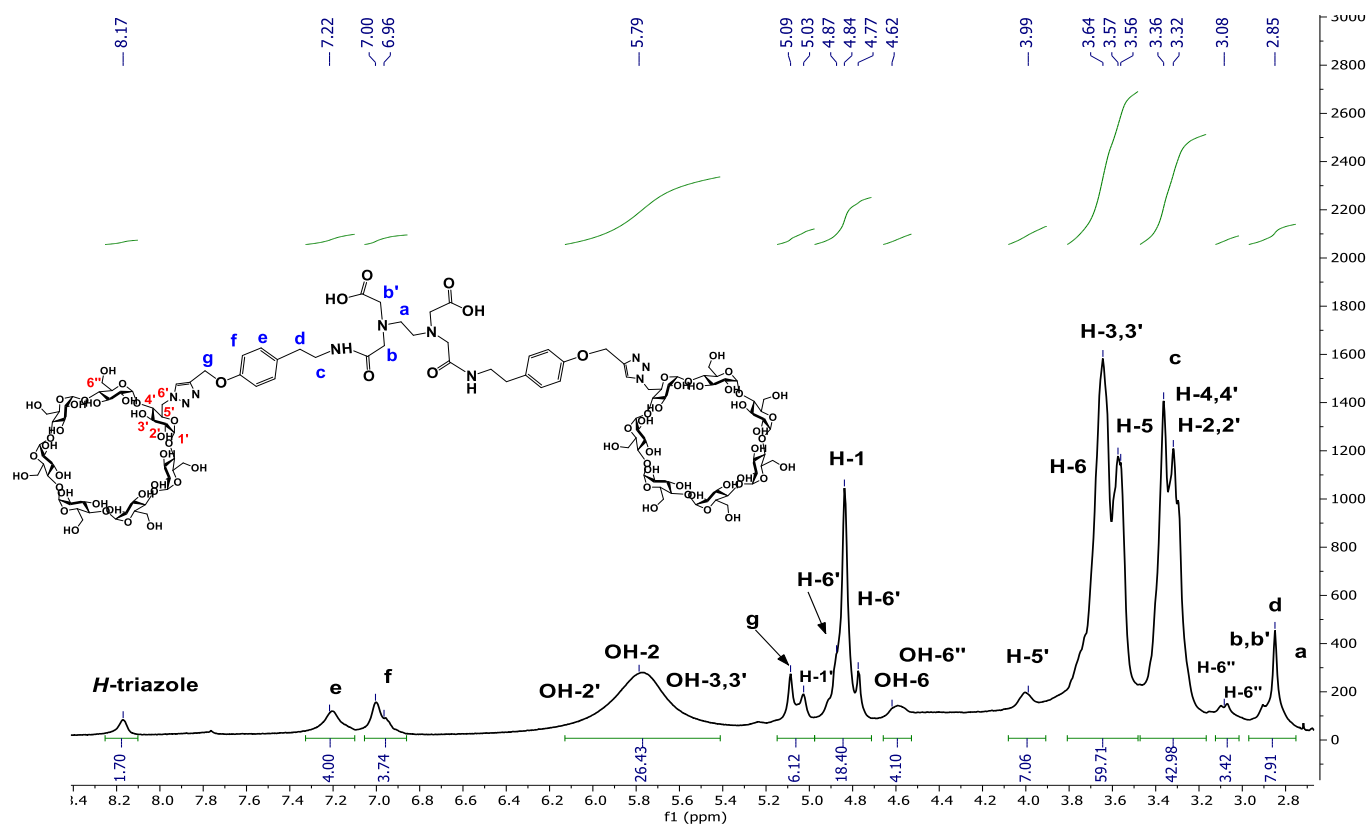

Figure S21.  $^1\text{H}$ -NMR spectrum of dendritic EDTA di- $\beta$ CD.

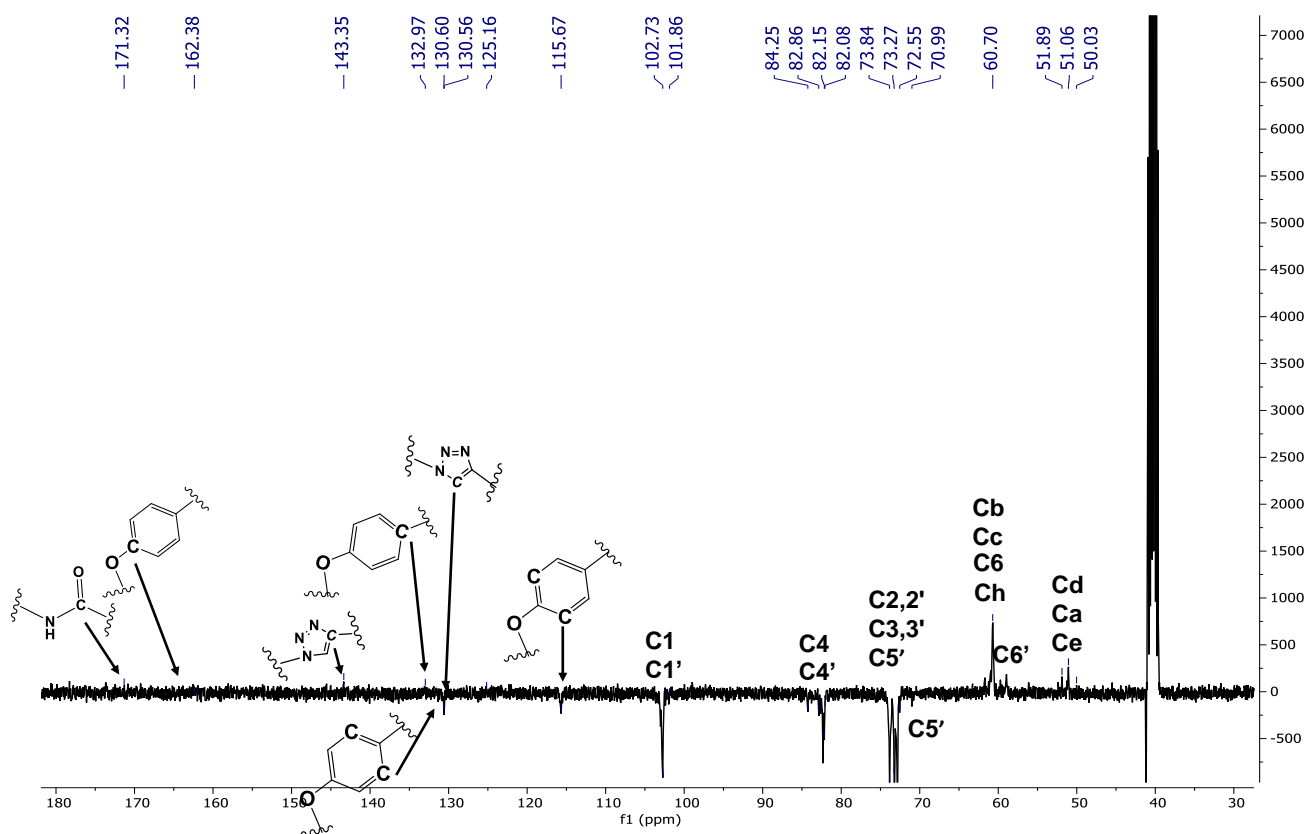

Figure S22.  $^{13}\text{C}$ -NMR spectrum of dendritic EDTA di- $\beta$ CD.

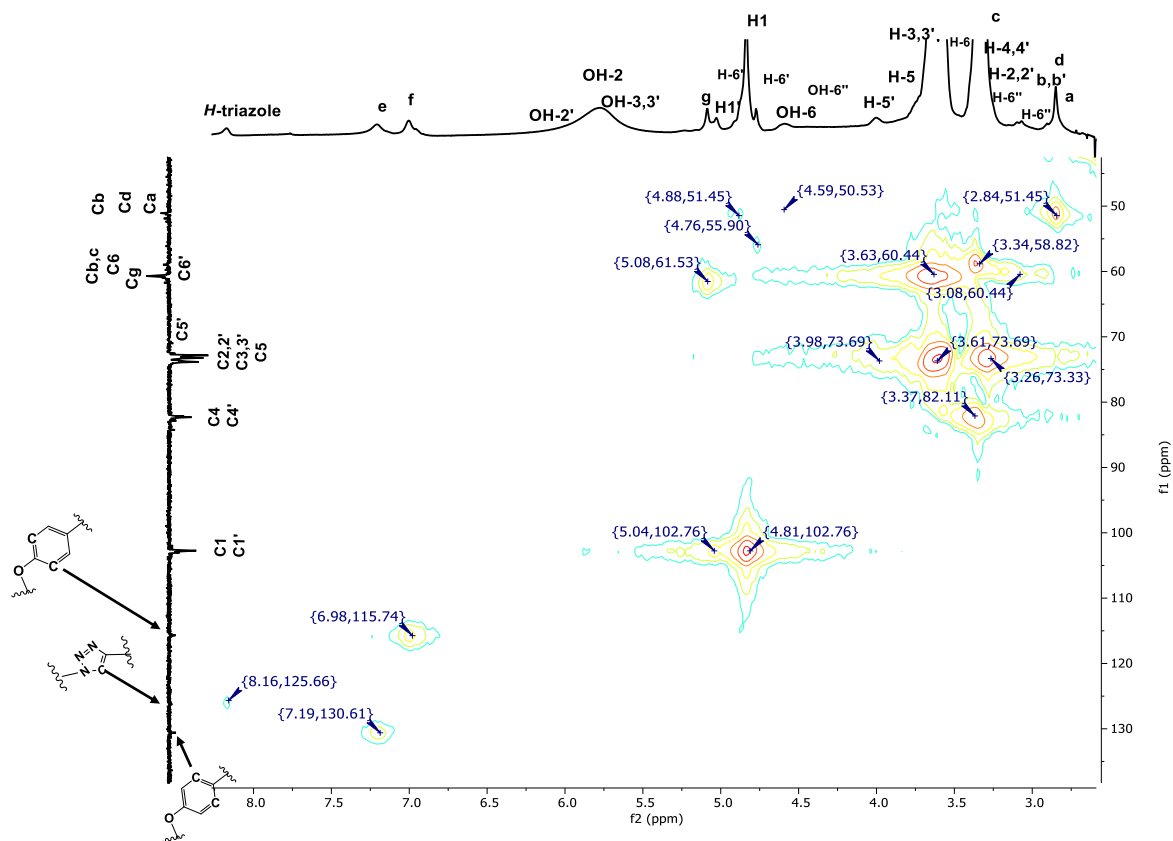

Figure S23. 2D NMR HMQC spectrum of dendritic EDTA di-βCD.

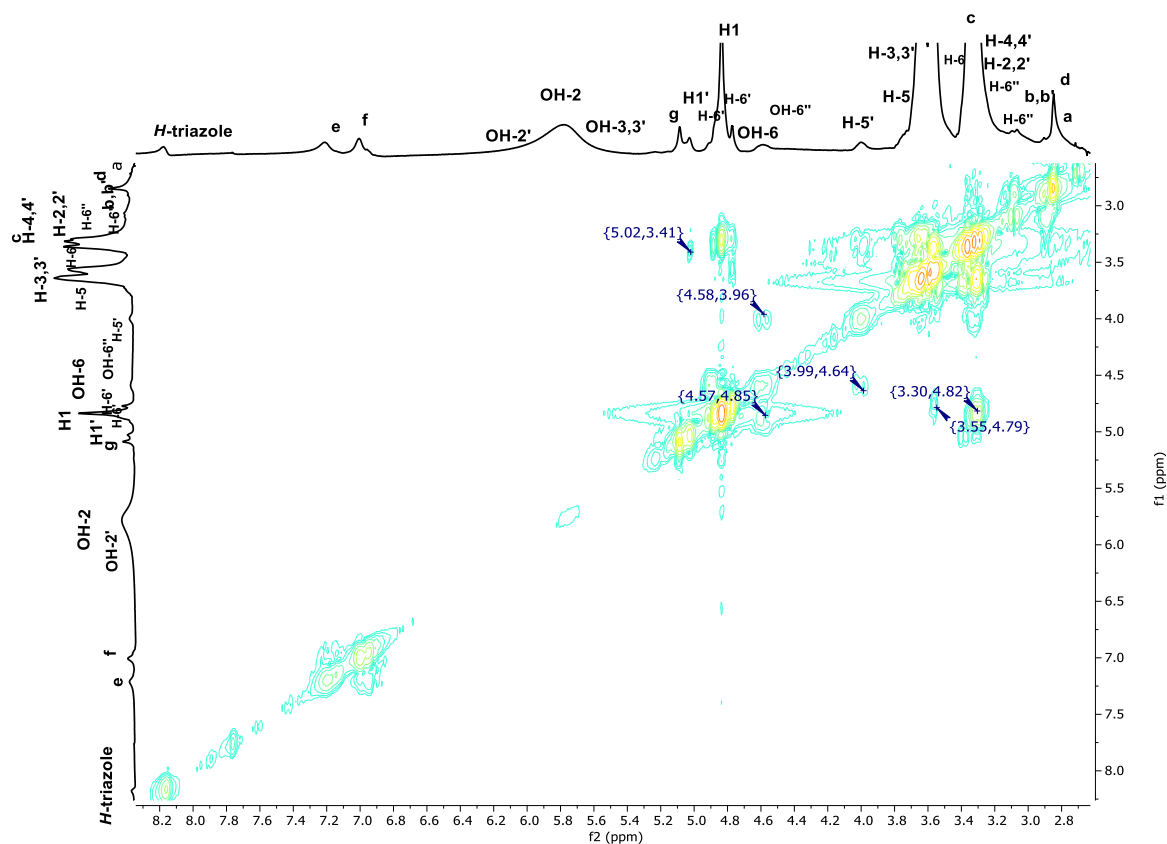

Figure S24. 2D NMR COSY spectrum of dendritic EDTA di-βCD.

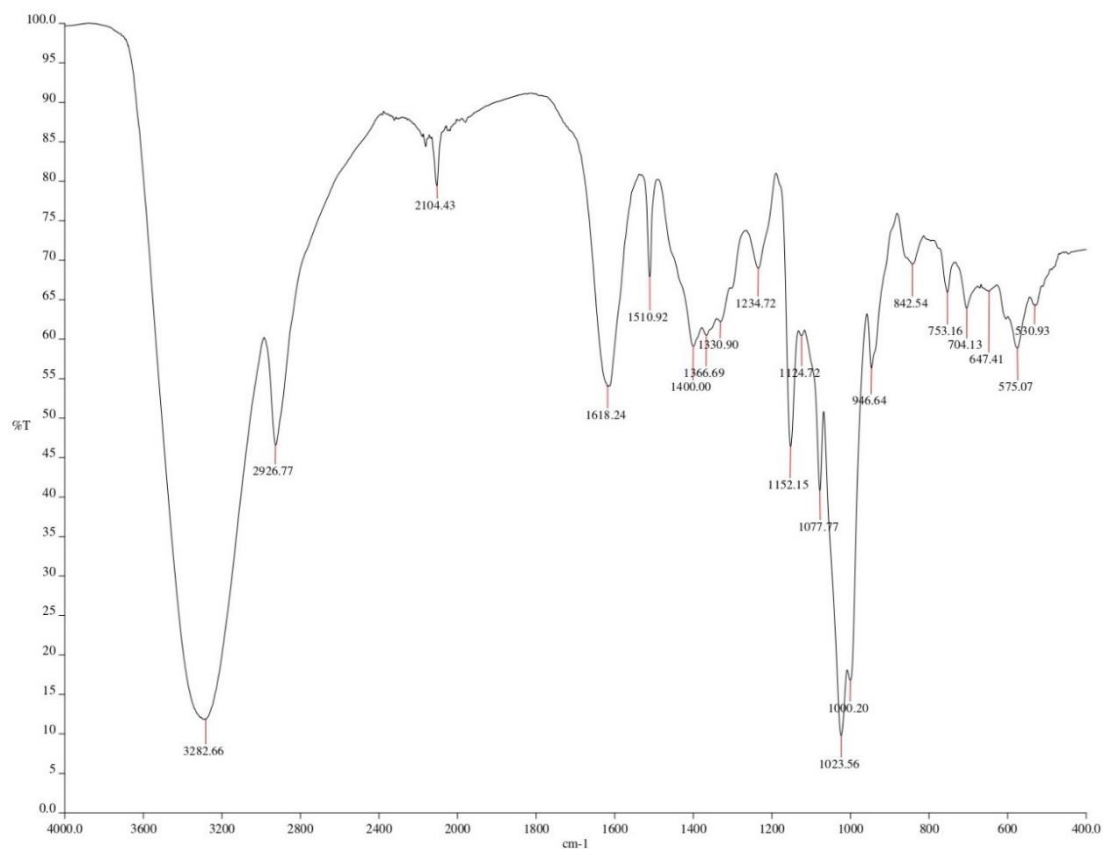

**Figure S25.** IR spectrum of dendritic EDTA di-βCD.

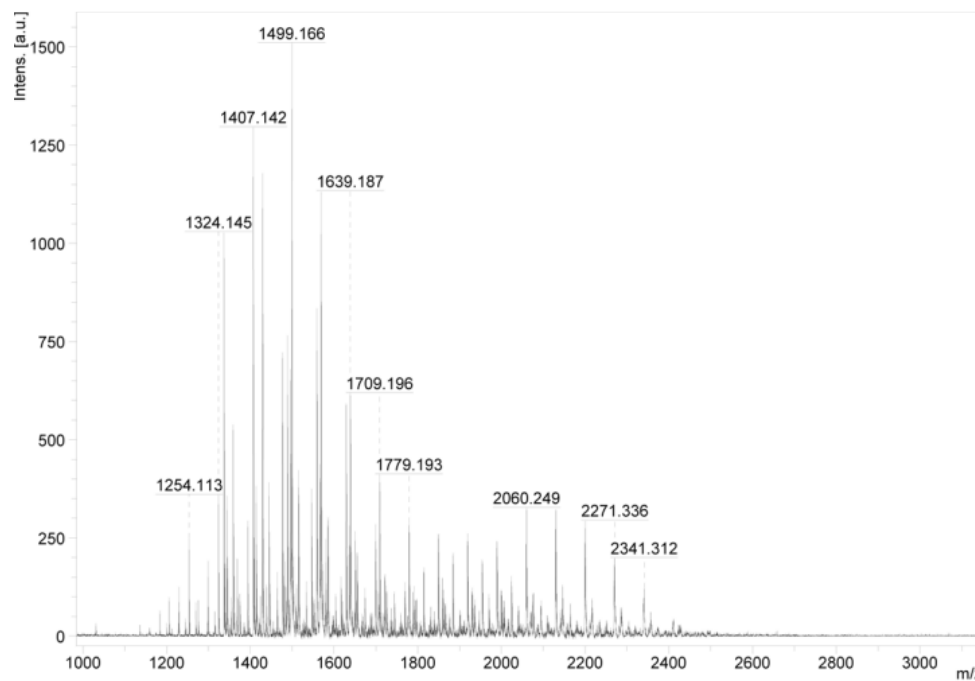

**Figure S26.** ESI-TOF spectrum of dendritic EDTA di-βCD.

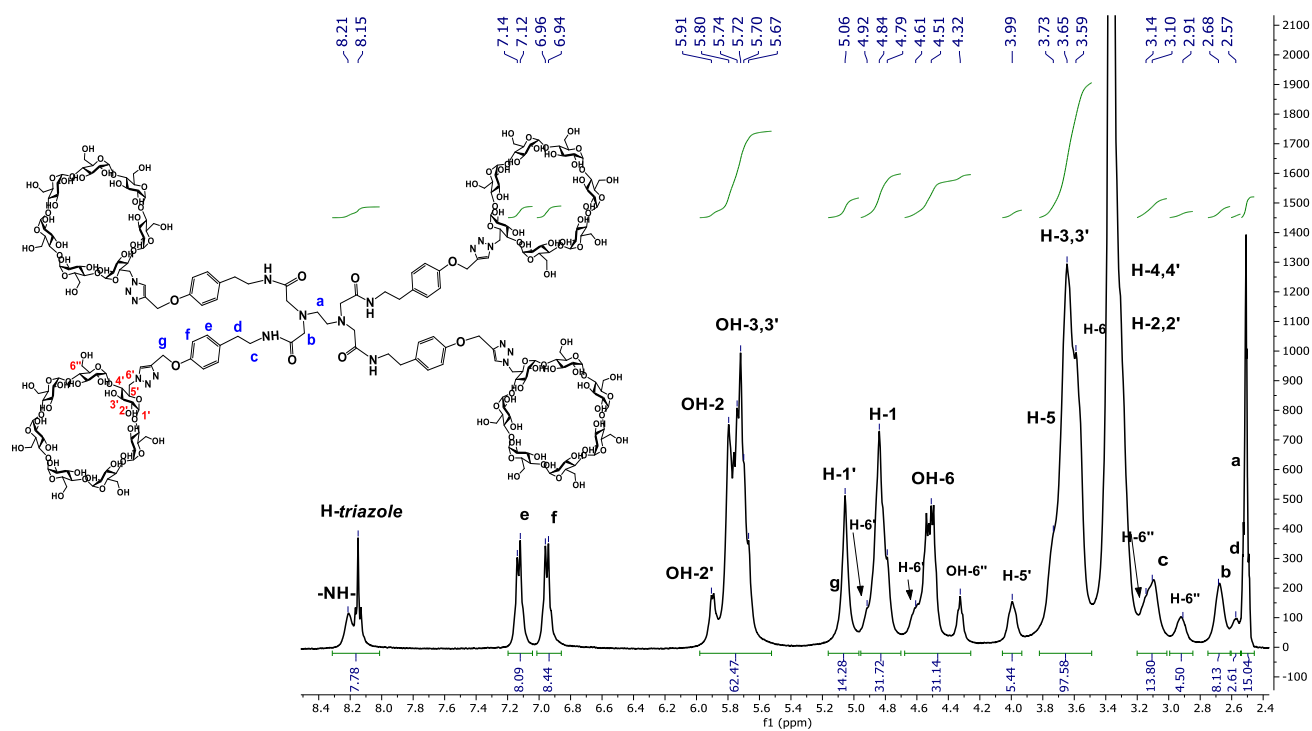

Figure S27.  $^1\text{H}$ -NMR spectrum of EDTA G0- $\beta$ CD dendrimer.

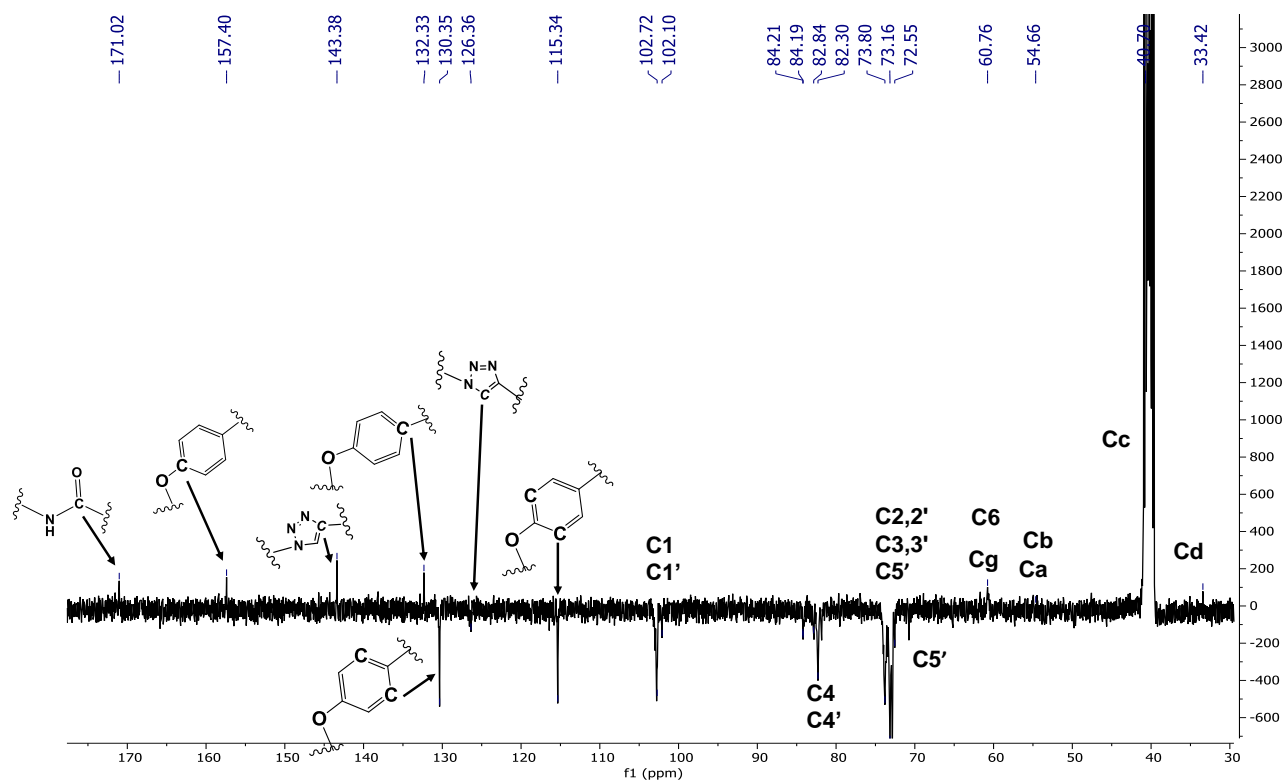

Figure S28.  $^{13}\text{C}$ -NMR spectrum of EDTA G0- $\beta$ CD dendrimer.

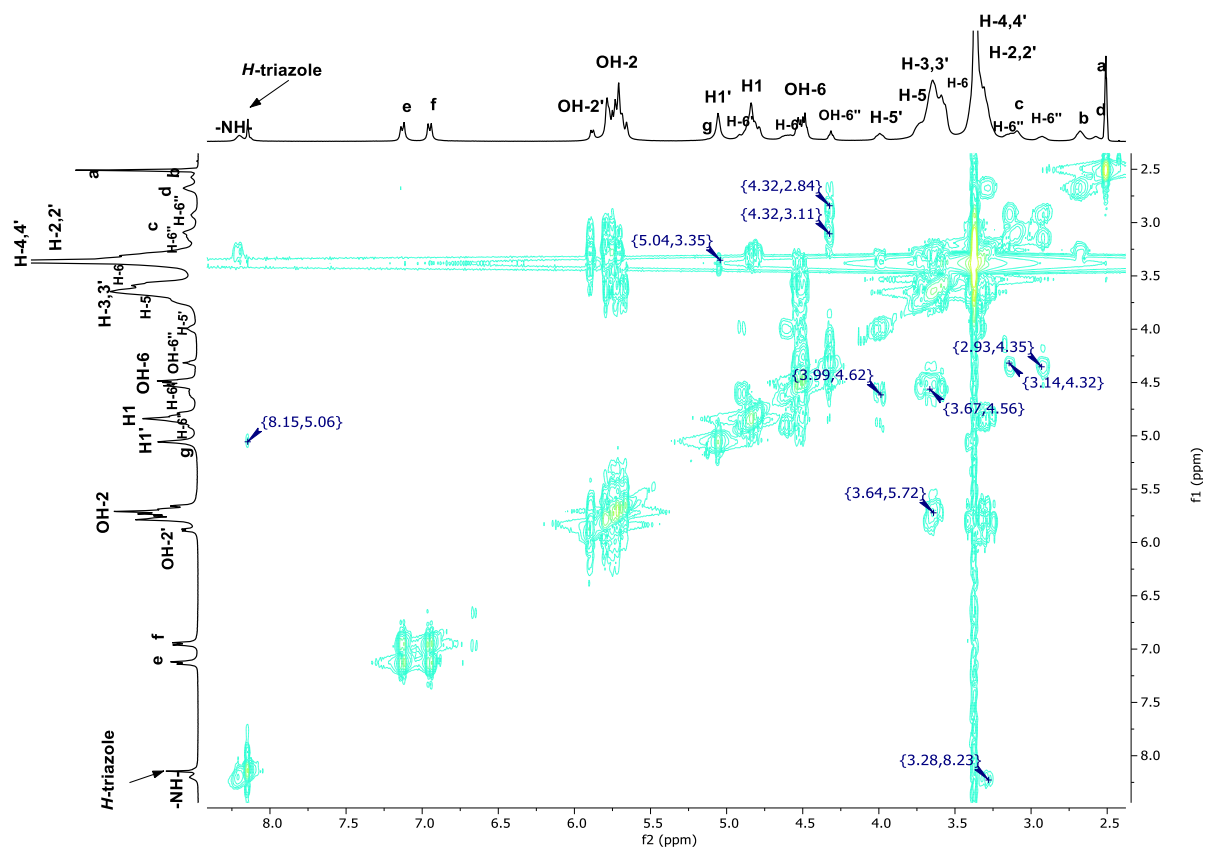

**Figure S29.** 2D NMR COSY spectrum of EDTA G0-βCD dendrimer.

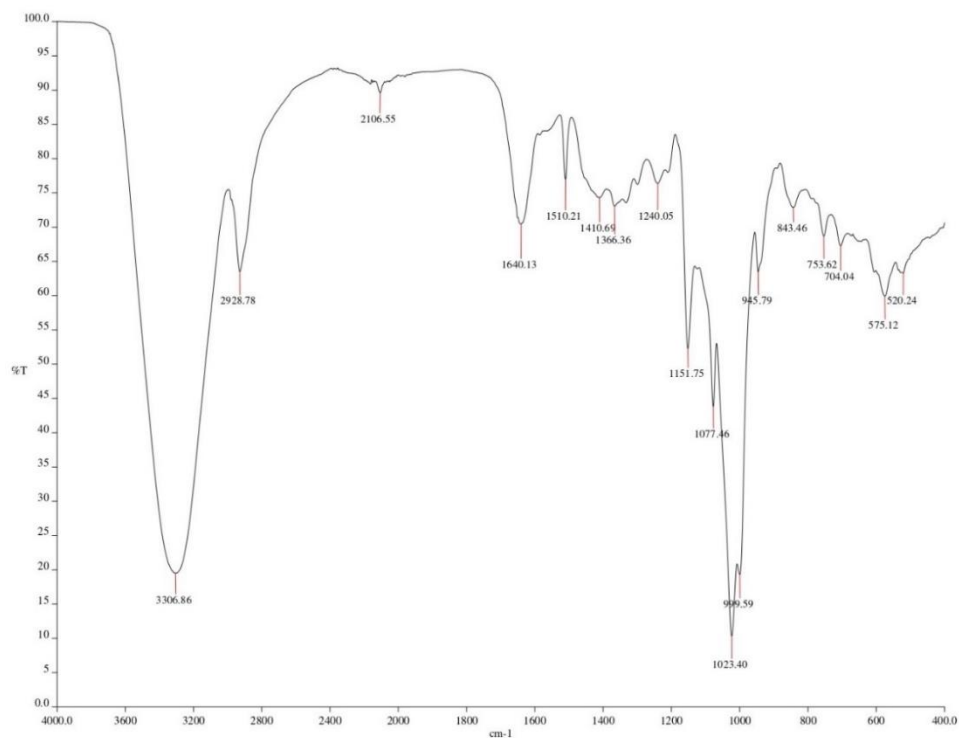

**Figure S30.** IR spectrum of EDTA G0-βCD dendrimer.

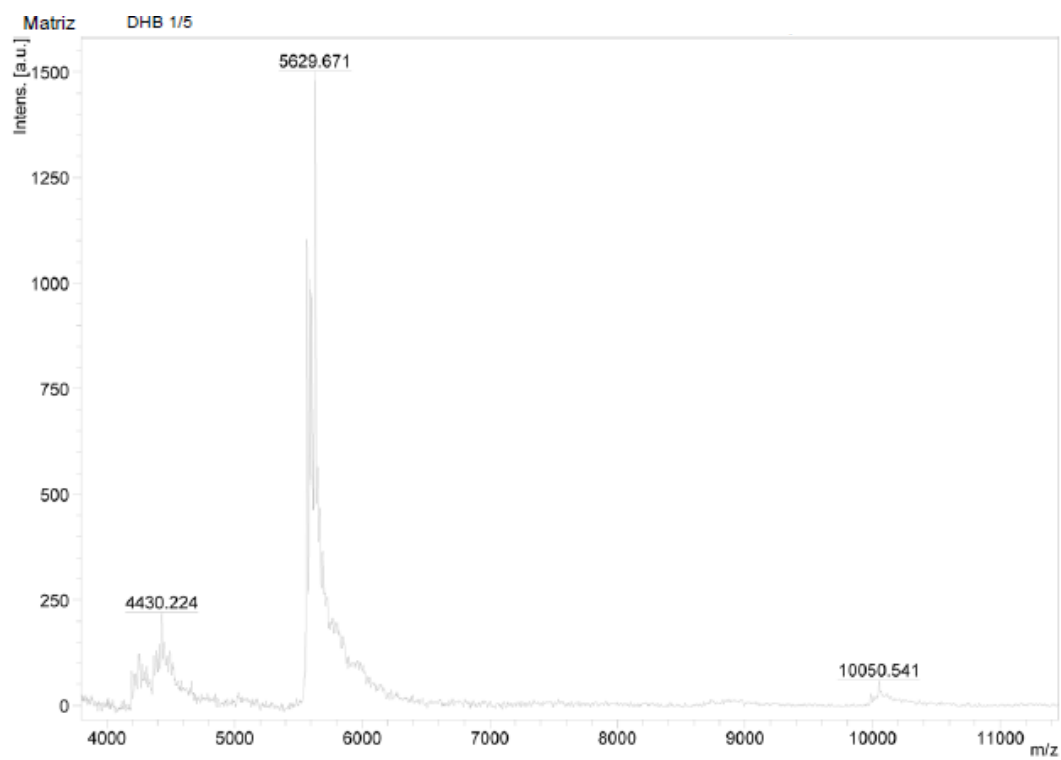

**Figure S31.** MALDI-TOF spectrum of EDTA G0- $\beta$ CD dendrimer.
